# Supplementary material for: Application of Deep Learning on Single-cell RNA Sequencing Data Analysis: A Review
Source: PubMed Central journal article supplement (PMC10025684; doi:10.1016/j.gpb.2022.11.011), 2022-12-14
Supplement: mmc1.pdf [file mmc1.pdf]

Identification

Records identified through PubMed  
(n = 192)

Additional records identified  
(n = 43)

Screening

Records after duplicates removed  
(n = 226)

Exclude studies:  
Not focusing on scRNA-seq data analysis;  
Not using deep learning;  
Not research article.

Included

Studies included for analysis  
(n = 98)
